# Supplementary material
Source: Springer Nature journal article supplement (https://www.springermedizin.de/resource/supplementary/12865_2009_256_MOESM9_ESM.pdf/9427612)

□ C.alb./PMN ■ C.alb./PMN + EGFR ab

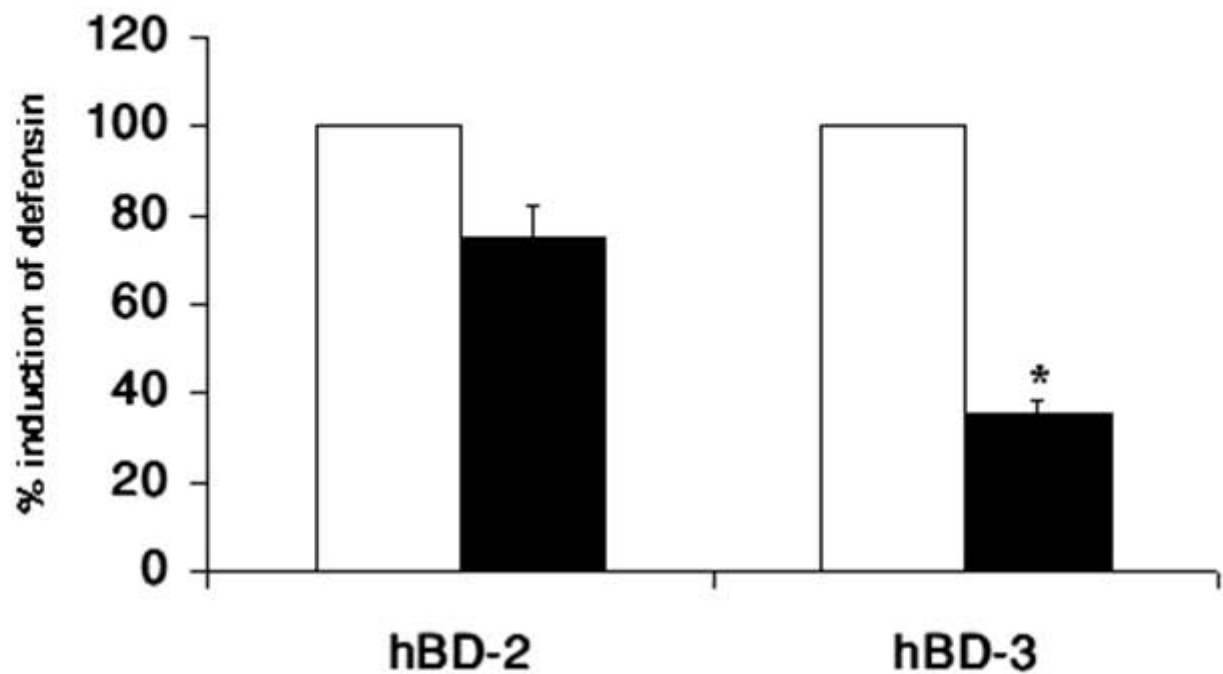

Supplement: MOESM9 [file 9427612]
